# Supplementary material for: Deposition of platinum patterns by a liquid process
Source: Royal Society of Chemistry journal article supplement (doi:10.1039/c1cc12138c), 2011-01-01
Supplement: c1cc12138c.pdf [file c1cc12138c.pdf]

*Support Information*

**Deposition of platinum pattern by a liquid process**

Zhongrong Shen, Jinwang Li, Yasuo Matsuki, and Tatsuya Shimoda

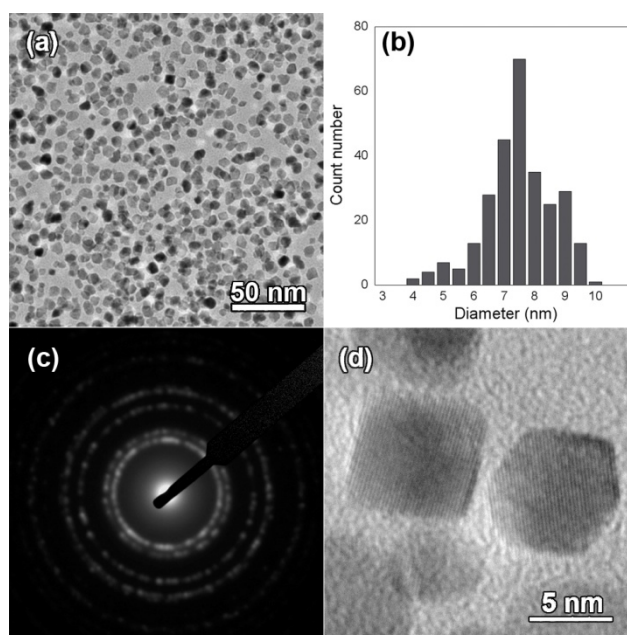

**Fig. S1** (a) TEM images of Pt nanoparticles prepared by the alcohol reduction; (b) Distribution diagram of Pt nanoparticles; (c) Selected area electron diffraction pattern of Pt nanoparticles; (d) High resolution TEM image of Pt nanoparticles.

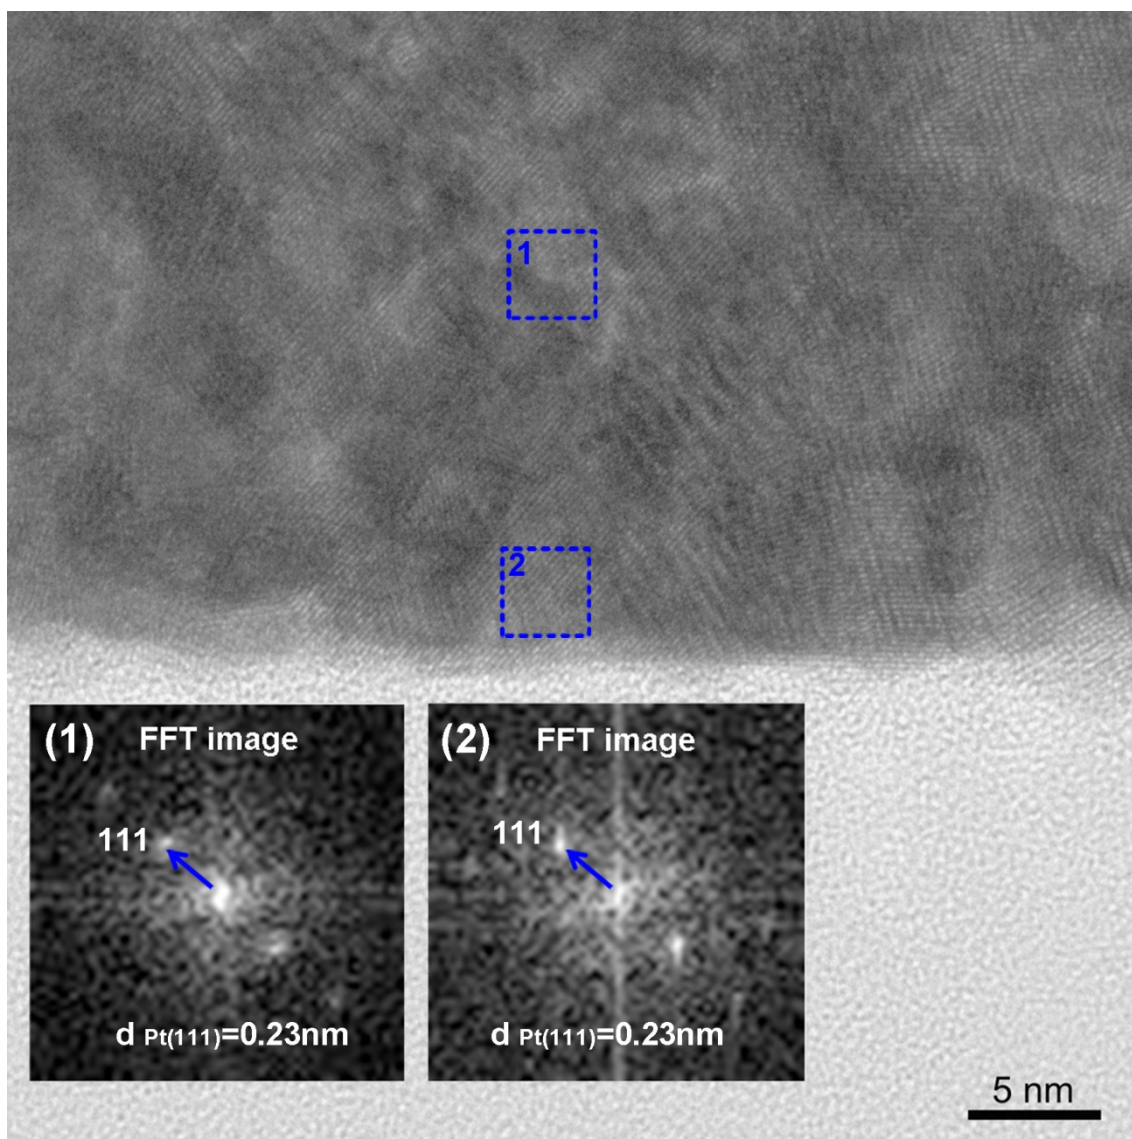

**Fig. S2** Cross-sectional HRTEM of Pt deposition film. Insets show two FFT images at the scanning area of (1) and (2), indicating the same crystalline orientation.

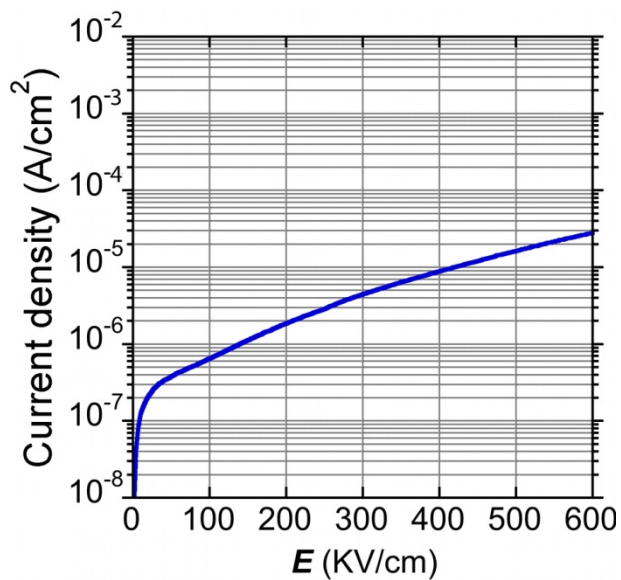

**Fig. S3** Leakage current of PZT film on the deposited Pt film by liquid process

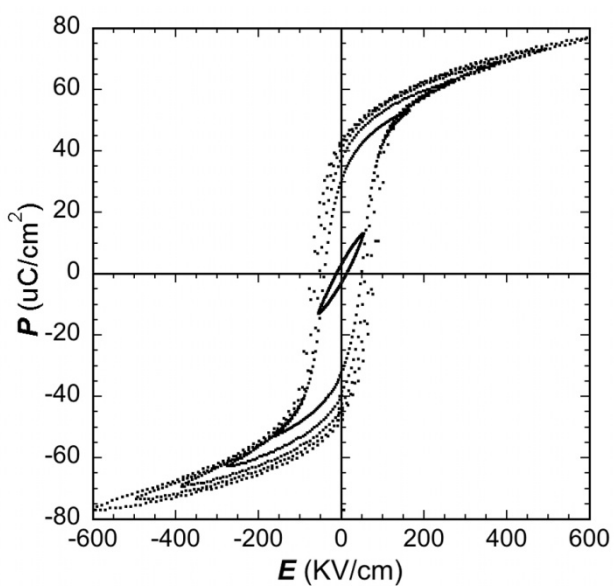

**Fig. S4** P-E hysteresis loops of PZT film on a sputtered Pt film (Tanaka Kikinzoku)
